# Supplementary material for: Reactive chlorine-, sulfur-, and nitrogen-containing volatile organic compounds impact atmospheric chemistry in the megacity of Delhi during both clean and extremely polluted seasons
Source: Copernicus journal article supplement (doi:10.5194/acp-24-13129-2024), 2024-11-28
Supplement: Supplementary file 1 [file acp-24-13129-2024-supplement.pdf]

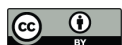

*Supplement of*

**Reactive chlorine-, sulfur-, and nitrogen-containing volatile organic compounds impact atmospheric chemistry in the megacity of Delhi during both clean and extremely polluted seasons**

Sachin Mishra et al.

*Correspondence to:* Vinayak Sinha (vsinha@iisermohali.ac.in)

The copyright of individual parts of the supplement might differ from the article licence.

Table S1: Operational settings for PTR-TOF-MS 10 K parameters used during this deployment

| Parameters                                       | Values           |
|--------------------------------------------------|------------------|
| Overall drift voltage ( $U_{\text{drift}}$ )     | 470 V            |
| Temperature at drift tube ( $T_{\text{drift}}$ ) | 120 °C           |
| Pressure at drift tube ( $P_{\text{drift}}$ )    | 3.0 mbar         |
| Length of the drift tube ( $L_{\text{drift}}$ )  | 9.2 cm           |
| Extraction time (t)                              | 26 $\mu\text{s}$ |
| Field strength of the drift tube (E/N)           | 120 Td           |

\*  $E$  is the electric field strength ( $\text{V cm}^{-1}$ ) and  $N$  is the gas number density ( $\text{molecule cm}^{-3}$ ).  $1 \text{ Td} = 10^{-17} \text{ V cm}^2$

Table S2: The Table lists 111 identified organic species, including the protonated  $m/z$ , molecular formula, names of probable compounds, the structure of a potential contributor (many other structural possibilities may be feasible), LoD (Limit of detection) along with the average mixing ratios (ppb) observed during the monsoon (July-Sep 2022) and post-monsoon (Oct-Nov 2022) seasons. Also provided are each compound's Interquartile Range (IQR), and diel emission profile indicative of whether its ambient levels are driven by primary emissions, photochemical formation/ biogenic/ evaporative or both.

| Sr No. | Type             | Protonated $m/z$ | Molecular formula      | Major Potential contributors                     | Structure of a potential contributor                                                | Average [Monsoon] (ppb) IQR | Average [post monsoon] (ppb) IQR | LoD (ppt) | Diurnal characteristics                        |
|--------|------------------|------------------|------------------------|--------------------------------------------------|-------------------------------------------------------------------------------------|-----------------------------|----------------------------------|-----------|------------------------------------------------|
| 1      | Pure Hydrocarbon | 41.035           | $\text{C}_3\text{H}_4$ | Propyne                                          |  | 3.043 (1.841)               | 9.997 (7.96)                     | 37        | Unimodal pattern with the evening peak         |
| 2      |                  | 43.051           | $\text{C}_3\text{H}_6$ | Propene                                          |  | 1.88 (1.21)                 | 4.965 (3.986)                    | 11        | Bimodal pattern with morning and evening peaks |
| 3      |                  | 53.035           | $\text{C}_4\text{H}_4$ | Vinylacetylene, 1-Buten-3-yne                    |  | 0.081 (0.055)               | 0.722 (0.778)                    | 15        | Bimodal pattern with morning and evening peaks |
| 4      |                  | 55.051           | $\text{C}_4\text{H}_6$ | 1,3-Butadiene, 1-Butyne, 2-Butyne, 1,2-Butadiene |  | 1.067 (0.555)               | 2.78 (1.913)                     | 22        | Bimodal pattern with morning and               |

|    |        |                                    |                                                         |                                                                                     |                  |                  |    |                                                                                                                       |               |
|----|--------|------------------------------------|---------------------------------------------------------|-------------------------------------------------------------------------------------|------------------|------------------|----|-----------------------------------------------------------------------------------------------------------------------|---------------|
|    |        |                                    |                                                         |                                                                                     |                  |                  |    |                                                                                                                       | evening peaks |
| 5  | 57.067 | <b>C<sub>4</sub>H<sub>8</sub></b>  | Methyl tert-butyl ether (MTBE) fragment / 1-Butene      |    | 1.813<br>(1.089) | 5.578<br>(4.581) | 21 | Bimodal pattern with morning and evening peaks                                                                        |               |
| 6  | 67.051 | <b>C<sub>5</sub>H<sub>6</sub></b>  | Cyclopentadiene, monoterpene fragment, butanol fragment |    | 0.172<br>(0.108) | 0.497<br>(0.336) | 3  | Bimodal pattern with afternoon and evening peaks                                                                      |               |
| 7  | 69.067 | <b>C<sub>5</sub>H<sub>8</sub></b>  | Isoprene + 2-methyl-3-butene-2-ol fragment              |    | 0.667<br>(0.582) | 1.118<br>(0.949) | 6  | Unimodal pattern with afternoon peak in monsoon while bimodal pattern with afternoon and evening peak in post-monsoon |               |
| 8  | 79.052 | <b>C<sub>6</sub>H<sub>6</sub></b>  | Benzene                                                 |  | 0.802<br>(0.633) | 3.724<br>(3.77)  | 3  | Bimodal pattern with morning and evening peaks                                                                        |               |
| 9  | 83.084 | <b>C<sub>6</sub>H<sub>10</sub></b> | Cyclohexene, Hexyne isomers                             |  | 0.319<br>(0.169) | 0.624<br>(0.474) | 5  | Bimodal pattern with afternoon and evening peaks                                                                      |               |
| 10 | 85.099 | <b>C<sub>6</sub>H<sub>12</sub></b> | Cyclohexane, Hexene                                     |  | 0.058<br>(0.036) | 0.16<br>(0.134)  | 2  | Bimodal pattern with morning and evening peaks                                                                        |               |
| 11 | 91.053 | <b>C<sub>7</sub>H<sub>6</sub></b>  | Monoterpene Fragment                                    |                                                                                     | 0.102<br>(0.077) | 0.714<br>(0.745) | 2  | Bimodal pattern with morning and evening peaks                                                                        |               |

|    |         |                                    |                                                 |                                                                                     |                  |                   |     |                                                  |
|----|---------|------------------------------------|-------------------------------------------------|-------------------------------------------------------------------------------------|------------------|-------------------|-----|--------------------------------------------------|
| 12 | 93.069  | <b>C<sub>7</sub>H<sub>8</sub></b>  | Toluene                                         | 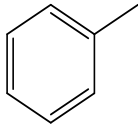   | 2.148<br>(1.813) | 9.372<br>(10.377) | 4   | Bimodal pattern with morning and evening peaks   |
| 13 | 95.084  | <b>C<sub>7</sub>H<sub>10</sub></b> | Monoterpene Fragment                            |                                                                                     | 0.103<br>(0.057) | 0.404<br>(0.293)  | 3   | Bimodal pattern with morning and evening peaks   |
| 14 | 97.1    | <b>C<sub>7</sub>H<sub>12</sub></b> | Cycloheptene, Alkyl fragment                    |    | 0.1<br>(0.058)   | 0.272<br>(0.217)  | 3   | Bimodal pattern with afternoon and evening peaks |
| 15 | 99.116  | <b>C<sub>7</sub>H<sub>14</sub></b> | Methylcyclohexane, Heptene & other hydrocarbons |    | 0.005<br>(0.003) | 0.014<br>(0.01)   | 1   | Bimodal pattern with afternoon and evening peaks |
| 16 | 105.069 | <b>C<sub>8</sub>H<sub>8</sub></b>  | Styrene                                         |  | 0.167<br>(0.104) | 0.699<br>(0.684)  | 1   | Bimodal pattern with morning and evening peaks   |
| 17 | 107.085 | <b>C<sub>8</sub>H<sub>10</sub></b> | Sum of C8-Aromatics                             |  | 1.123<br>(1.025) | 5.017<br>(5.247)  | 1   | Bimodal pattern with morning and evening peaks   |
| 18 | 109.1   | <b>C<sub>8</sub>H<sub>12</sub></b> | Terpene fragment/Cycl octadiene                 |  | 0.064<br>(0.032) | 0.205<br>(0.174)  | 2   | Bimodal pattern with afternoon and evening peaks |
| 19 | 111.116 | <b>C<sub>8</sub>H<sub>14</sub></b> | Ethenyl cyclohexane                             |  | 0.062<br>(0.035) | 0.159<br>(0.137)  | 1   | Bimodal pattern with afternoon and evening peaks |
| 20 | 119.085 | <b>C<sub>9</sub>H<sub>10</sub></b> | Terpene fragment                                |                                                                                     | 0.063<br>(0.04)  | 0.233<br>(0.214)  | 0.4 | Bimodal pattern with afternoon and evening peaks |

|    |         |                                     |                                                         |                                                                                     |                  |                  |     |                                                  |
|----|---------|-------------------------------------|---------------------------------------------------------|-------------------------------------------------------------------------------------|------------------|------------------|-----|--------------------------------------------------|
| 21 | 121.101 | <b>C<sub>9</sub>H<sub>12</sub></b>  | Sum of C-9 aromatics                                    | 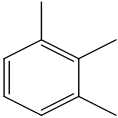   | 0.483<br>(0.449) | 2.267<br>(2.323) | 1   | Bimodal pattern with morning and evening peaks   |
| 22 | 123.116 | <b>C<sub>9</sub>H<sub>14</sub></b>  | Santene, 1,3-Cyclopentadiene & other hydrocarbons       |    | 0.039<br>(0.019) | 0.123<br>(0.11)  | 1   | Bimodal pattern with afternoon and evening peaks |
| 23 | 125.133 | <b>C<sub>9</sub>H<sub>16</sub></b>  | Nonyne, non-1,8-diene                                   |    | 0.021<br>(0.011) | 0.049<br>(0.043) | 1   | Bimodal pattern with afternoon and evening peaks |
| 24 | 129.07  | <b>C<sub>10</sub>H<sub>8</sub></b>  | Naphthalene                                             |    | 0.09<br>(0.052)  | 0.381<br>(0.343) | 1   | Bimodal pattern with morning and evening peaks   |
| 25 | 133.102 | <b>C<sub>10</sub>H<sub>12</sub></b> | Ethyl styrene, tetrahydronaphthalene                    |  | 0.044<br>(0.028) | 0.154<br>(0.134) | 0.5 | Bimodal pattern with morning and evening peaks   |
| 26 | 135.118 | <b>C<sub>10</sub>H<sub>14</sub></b> | P-cymene, C4-substituted benzene, C2-substituted xylene |  | 0.182<br>(0.153) | 0.912<br>(0.87)  | 0.4 | Bimodal pattern with morning and evening peaks   |
| 27 | 137.133 | <b>C<sub>10</sub>H<sub>16</sub></b> | Sum of Monoterpenes (MT)                                |  | 0.172<br>(0.108) | 0.497<br>(0.336) | 1   | Bimodal pattern with morning and evening peaks   |
| 28 | 143.086 | <b>C<sub>11</sub>H<sub>10</sub></b> | Methyl naphthalene                                      |  | 0.014<br>(0.009) | 0.063<br>(0.059) | 0.4 | Bimodal pattern with morning and evening peaks   |
| 29 | 145.102 | <b>C<sub>11</sub>H<sub>12</sub></b> | C2 substituted indene                                   |  | 0.007<br>(0.004) | 0.017<br>(0.016) | 1   | Trimodal pattern                                 |

|    |         |                                     |                                                             |                                                                                     |                  |                  |     |                                                  |
|----|---------|-------------------------------------|-------------------------------------------------------------|-------------------------------------------------------------------------------------|------------------|------------------|-----|--------------------------------------------------|
| 30 | 147.118 | <b>C<sub>11</sub>H<sub>14</sub></b> | Cyclopentylbenzene & other hydrocarbons                     | 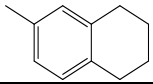   | 0.035<br>(0.022) | 0.086<br>(0.079) | 1   | Trimodal pattern                                 |
| 31 | 157.099 | <b>C<sub>12</sub>H<sub>12</sub></b> | C2-substituted naphthalene                                  |    | 0.014<br>(0.006) | 0.039<br>(0.032) | 1   | Bimodal pattern with afternoon and evening peaks |
| 32 | 161.134 | <b>C<sub>12</sub>H<sub>16</sub></b> | Cyclohexylbenzene, butyl styrene, cyclopentylmethylbenzene  |    | 0.015<br>(0.009) | 0.042<br>(0.038) | 0.3 | Trimodal pattern                                 |
| 33 | 175.15  | <b>C<sub>13</sub>H<sub>18</sub></b> | 1,1,6-Trimethyltetralin/ ionene                             |    | 0.006<br>(0.004) | 0.022<br>(0.021) | 0.3 | Trimodal pattern                                 |
| 34 | 177.165 | <b>C<sub>13</sub>H<sub>20</sub></b> | C7-substituted benzene,                                     |   | 0.011<br>(0.006) | 0.03<br>(0.028)  | 0.4 | Trimodal pattern                                 |
| 35 | 179.181 | <b>C<sub>13</sub>H<sub>22</sub></b> | C3-substituted adamantane                                   |  | 0.004<br>(0.003) | 0.015<br>(0.014) | 0.4 | Trimodal pattern                                 |
| 36 | 183.121 | <b>C<sub>14</sub>H<sub>14</sub></b> | Bibenzyl                                                    |  | 0.003<br>(0.002) | 0.006<br>(0.004) | 0.4 | Unimodal pattern with afternoon peak             |
| 37 | 187.148 | <b>C<sub>14</sub>H<sub>18</sub></b> | C4-substituted dihydroazulene, benzyl cycloheptene          |  | 0.004<br>(0.002) | 0.008<br>(0.006) | 0.3 | Unimodal pattern with afternoon peak             |
| 38 | 189.165 | <b>C<sub>14</sub>H<sub>20</sub></b> | C4-substituted dihydronaphthalene, cyclopentylpropylbenzene |  | 0.004<br>(0.003) | 0.012<br>(0.011) | 0.2 | Trimodal pattern                                 |
| 39 | 191.181 | <b>C<sub>14</sub>H<sub>22</sub></b> | C8-substituted benzene                                      |  | 0.005<br>(0.004) | 0.015<br>(0.014) | 0.3 | Trimodal pattern                                 |
| 40 | 217.195 | <b>C<sub>16</sub>H<sub>24</sub></b> | C6-substituted dihydronaphthalene                           |  | 0.002<br>(0.001) | 0.005<br>(0.004) | 0.2 | Trimodal pattern                                 |

|    |                 |         |                                                |                             |                                                                                     |                  |                    |     |                                                  |
|----|-----------------|---------|------------------------------------------------|-----------------------------|-------------------------------------------------------------------------------------|------------------|--------------------|-----|--------------------------------------------------|
| 41 |                 | 233.228 | <b>C<sub>17</sub>H<sub>28</sub></b>            | C11-substituted benzene     | 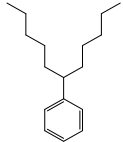   | 0.002<br>(0.001) | 0.004<br>(0.003)   | 0.2 | Bimodal pattern with afternoon and evening peaks |
| 42 |                 | 247.243 | <b>C<sub>18</sub>H<sub>30</sub></b>            | C12-substituted benzene     |    | 0.002<br>(0.002) | 0.003<br>(0.002)   | 0.2 | Unimodal pattern with afternoon peak             |
| 43 | OXYGENATED VOCS | 31.014  | <b>CH<sub>2</sub>O</b>                         | Formaldehyde                |    | 0.359<br>(0.233) | 1.706<br>(1.249)   | 38  | Bimodal pattern with afternoon and evening peaks |
| 44 |                 | 33.03   | <b>CH<sub>4</sub>O</b>                         | Methanol                    |    | 9.854<br>(4.928) | 19.919<br>(13.854) | 25  | Bimodal pattern with monsoon and evening peaks   |
| 45 |                 | 45.03   | <b>C<sub>2</sub>H<sub>4</sub>O</b>             | Acetaldehyde                |   | 3.339<br>(1.866) | 7.755<br>(5.8)     | 21  | Bimodal pattern with afternoon and evening peaks |
| 46 |                 | 47.009  | <b>CH<sub>2</sub>O<sub>2</sub></b>             | Formic acid                 |  | 0.716<br>(0.568) | 1.32<br>(1.096)    | 16  | Unimodal pattern with afternoon peak             |
| 47 |                 | 47.046  | <b>C<sub>2</sub>H<sub>6</sub>O</b>             | Ethanol                     |  | 0.212<br>(0.16)  | 0.55<br>(0.505)    | 2   | Bimodal pattern with morning and evening peaks   |
| 48 |                 | 57.03   | <b>C<sub>3</sub>H<sub>4</sub>O</b>             | Acrolein                    |  | 0.157<br>(0.096) | 0.674<br>(0.598)   | 6   | Bimodal pattern with morning and evening peaks   |
| 49 |                 | 59.046  | <b>C<sub>3</sub>H<sub>6</sub>O</b>             | Acetone + Propanal          |  | 3.647<br>(2.162) | 10.593<br>(8.485)  | 13  | Bimodal pattern with afternoon and evening peaks |
| 50 |                 | 61.025  | <b>C<sub>2</sub>H<sub>4</sub>O<sub>2</sub></b> | Acetic acid+ Glycolaldehyde |  | 4.103<br>(3.342) | 6.585<br>(5.269)   | 9   | Trimodal pattern                                 |

|    |  |        |                                                |                                              |                                                                                     |                  |                  |    |                                                  |
|----|--|--------|------------------------------------------------|----------------------------------------------|-------------------------------------------------------------------------------------|------------------|------------------|----|--------------------------------------------------|
| 51 |  | 69.031 | <b>C<sub>4</sub>H<sub>4</sub>O</b>             | Furan                                        |    | 0.032<br>(0.019) | 0.168<br>(0.135) | 1  | Bimodal pattern with morning and evening peaks   |
| 52 |  | 71.047 | <b>C<sub>4</sub>H<sub>6</sub>O</b>             | Methyl Vinyl Ketone, Methacrolein, 2-Butenal |    | 0.291<br>(0.189) | 0.498<br>(0.419) | 4  | Bimodal pattern with morning and evening peaks   |
| 53 |  | 73.026 | <b>C<sub>3</sub>H<sub>4</sub>O<sub>2</sub></b> | Methyl glyoxal                               |    | 0.161<br>(0.109) | 0.261<br>(0.259) | 13 | Unimodal pattern with afternoon peak             |
| 54 |  | 73.062 | <b>C<sub>4</sub>H<sub>8</sub>O</b>             | Butanal, 2-Butanone, MEK                     |    | 0.555<br>(0.388) | 1.418<br>(1.195) | 3  | Bimodal pattern with morning and evening peaks   |
| 55 |  | 75.042 | <b>C<sub>3</sub>H<sub>6</sub>O<sub>2</sub></b> | Hydroxyacetone                               |   | 0.278<br>(0.143) | 1.012<br>(0.849) | 3  | Bimodal pattern with morning and evening peaks   |
| 56 |  | 81.031 | <b>C<sub>5</sub>H<sub>4</sub>O</b>             | 2,4-Cyclopentadiene-1-one                    |  | 0.014<br>(0.007) | 0.06<br>(0.055)  | 1  | Bimodal pattern with morning and evening peaks   |
| 57 |  | 83.047 | <b>C<sub>5</sub>H<sub>6</sub>O</b>             | 2-Methyl furan                               |  | 0.05<br>(0.026)  | 0.205<br>(0.157) | 2  | Bimodal pattern with morning and evening peaks   |
| 58 |  | 85.027 | <b>C<sub>4</sub>H<sub>4</sub>O<sub>2</sub></b> | 2-Furanone / butenedial                      |  | 0.05<br>(0.034)  | 0.275<br>(0.213) | 2  | Bimodal pattern with afternoon and evening peaks |
| 59 |  | 85.063 | <b>C<sub>5</sub>H<sub>8</sub>O</b>             | Cyclopentanone                               |  | 0.06<br>(0.03)   | 0.167<br>(0.132) | 1  | Bimodal pattern with afternoon and evening peaks |



|    |        |                                                |                                                                                   |                                                                                     |                  |                  |   |                                                                                                                                    |
|----|--------|------------------------------------------------|-----------------------------------------------------------------------------------|-------------------------------------------------------------------------------------|------------------|------------------|---|------------------------------------------------------------------------------------------------------------------------------------|
| 60 | 87.043 | <b>C<sub>4</sub>H<sub>6</sub>O<sub>2</sub></b> | 2,3<br>butanedione/<br>biacetyl                                                   | 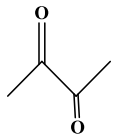   | 0.175<br>(0.094) | 0.566<br>(0.465) | 5 | Bimodal<br>pattern with<br>afternoon<br>and<br>evening<br>peaks                                                                    |
| 61 | 87.079 | <b>C<sub>5</sub>H<sub>10</sub>O</b>            | 2-Pentanone,<br>2-methyl-3-<br>butene-2-ol,<br>Pentanal                           |    | 0.052<br>(0.031) | 0.141<br>(0.132) | 1 | Bimodal<br>pattern with<br>afternoon<br>and<br>evening<br>peaks                                                                    |
| 62 | 89.058 | <b>C<sub>4</sub>H<sub>8</sub>O<sub>2</sub></b> | Butanoic acid,<br>Ethyl acetate                                                   |    | 0.281<br>(0.234) | 0.533<br>(0.449) | 2 | Bimodal<br>pattern with<br>morning<br>and<br>afternoon<br>peaks                                                                    |
| 63 | 95.048 | <b>C<sub>6</sub>H<sub>6</sub>O</b>             | Phenol                                                                            |   | 0.097<br>(0.057) | 0.418<br>(0.352) | 3 | Trimodal<br>pattern in<br>monsoon<br>while<br>bimodal<br>pattern with<br>morning<br>and<br>evening<br>peaks in<br>post-<br>monsoon |
| 64 | 97.027 | <b>C<sub>5</sub>H<sub>4</sub>O<sub>2</sub></b> | Furfural                                                                          |  | 0.048<br>(0.036) | 0.355<br>(0.294) | 2 | Bimodal<br>pattern with<br>morning<br>and<br>evening<br>peaks                                                                      |
| 65 | 97.063 | <b>C<sub>6</sub>H<sub>8</sub>O</b>             | C2 substituted<br>furan, 2-<br>methyl-2-<br>Cyclopenten-<br>1-one                 |  | 0.034<br>(0.016) | 0.132<br>(0.098) | 2 | Bimodal<br>pattern with<br>morning<br>and<br>evening<br>peaks                                                                      |
| 66 | 99.043 | <b>C<sub>5</sub>H<sub>6</sub>O<sub>2</sub></b> | Furfuryl<br>alcohol, 3-<br>Methyl-2-<br>furanone, 4-<br>Methyl-5H-<br>furan-2-one |  | 0.081<br>(0.059) | 0.267<br>(0.251) | 3 | Unimodal<br>pattern with<br>afternoon<br>peak                                                                                      |
| 67 | 99.079 | <b>C<sub>6</sub>H<sub>10</sub>O</b>            | Cyclohexanon<br>e                                                                 |  | 0.167<br>(0.109) | 0.424<br>(0.346) | 2 | Bimodal<br>pattern with<br>afternoon<br>and<br>evening<br>peaks                                                                    |

|    |         |                                                 |                                                                        |                                                                                     |                  |                  |   |                                                                                                 |
|----|---------|-------------------------------------------------|------------------------------------------------------------------------|-------------------------------------------------------------------------------------|------------------|------------------|---|-------------------------------------------------------------------------------------------------|
| 68 | 101.059 | <b>C<sub>5</sub>H<sub>8</sub>O<sub>2</sub></b>  | 2,3-Pentanedione, methyl methacrylate & other hydrocarbons             | 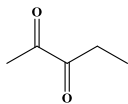   | 0.129<br>(0.074) | 0.304<br>(0.268) | 2 | Bimodal pattern with afternoon and evening peaks                                                |
| 69 | 107.049 | <b>C<sub>7</sub>H<sub>6</sub>O</b>              | Benzaldehyde                                                           |    | 0.06<br>(0.046)  | 0.202<br>(0.19)  | 1 | Bimodal pattern with afternoon and evening peaks                                                |
| 70 | 109.064 | <b>C<sub>7</sub>H<sub>8</sub>O</b>              | Methylphenol isomers, Anisole                                          |    | 0.027<br>(0.016) | 0.1<br>(0.078)   | 1 | Bimodal pattern with morning and evening peaks                                                  |
| 71 | 111.042 | <b>C<sub>6</sub>H<sub>6</sub>O<sub>2</sub></b>  | 5-Methylfurfural, Hydroxyphenol                                        |   | 0.015<br>(0.01)  | 0.097<br>(0.083) | 2 | Trimodal pattern in monsoon while Bimodal pattern with morning and evening peak in post-monsoon |
| 72 | 111.08  | <b>C<sub>7</sub>H<sub>10</sub>O</b>             | C3-substituted furans, C2-substituted cyclopentene, methyl cyclohexene |  | 0.021<br>(0.011) | 0.081<br>(0.068) | 1 | Bimodal pattern with morning and evening peaks                                                  |
| 73 | 113.059 | <b>C<sub>6</sub>H<sub>8</sub>O<sub>2</sub></b>  | Dimethylbutenedial / C4-substituted aldehyde                           |  | 0.047<br>(0.027) | 0.159<br>(0.159) | 2 | Bimodal pattern with morning and evening peaks                                                  |
| 74 | 115.039 | <b>C<sub>5</sub>H<sub>6</sub>O<sub>3</sub></b>  | 5-Hydroxymethyl-2-furanone/ methylepoxybutanedial                      |  | 0.014<br>(0.01)  | 0.046<br>(0.046) | 1 | Unimodal pattern with afternoon peak                                                            |
| 75 | 115.075 | <b>C<sub>6</sub>H<sub>10</sub>O<sub>2</sub></b> | C6 diketone isomers/ C6 esters                                         |  | 0.051<br>(0.028) | 0.124<br>(0.121) | 2 | Unimodal pattern with afternoon peak                                                            |
| 76 | 121.064 | <b>C<sub>8</sub>H<sub>8</sub>O</b>              | Tolualdehyde                                                           |  | 0.065<br>(0.046) | 0.209<br>(0.195) | 1 | Bimodal pattern with afternoon                                                                  |

|    |         |                                                 |                                       |                                                                                     |                  |                  |     |                                                  |                   |
|----|---------|-------------------------------------------------|---------------------------------------|-------------------------------------------------------------------------------------|------------------|------------------|-----|--------------------------------------------------|-------------------|
|    |         |                                                 |                                       |                                                                                     |                  |                  |     |                                                  | and evening peaks |
| 77 | 123.044 | <b>C<sub>7</sub>H<sub>6</sub>O<sub>2</sub></b>  | 2-Hydroxybenzaldehyde                 | 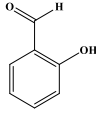   | 0.027<br>(0.017) | 0.119<br>(0.104) | 1   | Unimodal pattern with afternoon peak             |                   |
| 78 | 123.08  | <b>C<sub>8</sub>H<sub>10</sub>O</b>             | C2-substituted phenol, methyl anisole |    | 0.015<br>(0.008) | 0.054<br>(0.046) | 1   | Bimodal pattern with morning and evening peaks   |                   |
| 79 | 125.06  | <b>C<sub>7</sub>H<sub>8</sub>O<sub>2</sub></b>  | Guaiacol                              |    | 0.016<br>(0.009) | 0.06<br>(0.049)  | 1   | Bimodal pattern with afternoon and evening peaks |                   |
| 80 | 127.039 | <b>C<sub>6</sub>H<sub>6</sub>O<sub>3</sub></b>  | Hydroxymethyl furfural                |    | 0.009<br>(0.006) | 0.044<br>(0.039) | 2   | Unimodal pattern with afternoon peak             |                   |
| 81 | 127.075 | <b>C<sub>7</sub>H<sub>10</sub>O<sub>2</sub></b> | Trimethylbutenedial / Methyl sorbate  |  | 0.025<br>(0.013) | 0.077<br>(0.07)  | 1   | Unimodal pattern with afternoon peak             |                   |
| 82 | 129.092 | <b>C<sub>7</sub>H<sub>12</sub>O<sub>2</sub></b> | C7-diketone/heptane-2,6-dione         |  | 0.025<br>(0.016) | 0.051<br>(0.049) | 1   | Unimodal pattern with afternoon peak             |                   |
| 83 | 133.065 | <b>C<sub>9</sub>H<sub>8</sub>O</b>              | Methyl benzofuran                     |  | 0.007<br>(0.003) | 0.027<br>(0.023) | 0.3 | Bimodal pattern with morning and evening peaks   |                   |
| 84 | 135.08  | <b>C<sub>9</sub>H<sub>10</sub>O</b>             | 3-Methylacetophenone                  |  | 0.016<br>(0.01)  | 0.058<br>(0.054) | 0.4 | Bimodal pattern with morning and evening peaks   |                   |
| 85 | 143.108 | <b>C<sub>8</sub>H<sub>14</sub>O<sub>2</sub></b> | 2,3-Octanedione                       |  | 0.02<br>(0.011)  | 0.04<br>(0.035)  | 1   | Unimodal pattern with afternoon peak             |                   |
| 86 | 145.051 | <b>C<sub>6</sub>H<sub>8</sub>O<sub>4</sub></b>  | Organic acids/levoglucosan fragment   |  | 0.006<br>(0.003) | 0.022<br>(0.018) | 1   | Unimodal pattern with afternoon peak             |                   |
| 87 | 145.123 | <b>C<sub>8</sub>H<sub>16</sub>O<sub>2</sub></b> | n-Octanoic acid                       |  | 0.030<br>(0.017) | 0.059<br>(0.048) | 1   | Unimodal pattern with afternoon                  |                   |

|    |         |                                                 |                                               |                                                                                     |                  |                  |   |                                                                                                                       |                                                                                       |
|----|---------|-------------------------------------------------|-----------------------------------------------|-------------------------------------------------------------------------------------|------------------|------------------|---|-----------------------------------------------------------------------------------------------------------------------|---------------------------------------------------------------------------------------|
|    |         |                                                 |                                               |                                                                                     |                  |                  |   |                                                                                                                       | peak in monsoon while bimodal pattern with afternoon and evening peak in post-monsoon |
| 88 | 149.024 | <b>C<sub>8</sub>H<sub>4</sub>O<sub>3</sub></b>  | Phthalic anhydride/<br>2,3-Benzofurandione    | 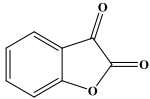   | 0.014<br>(0.011) | 0.062<br>(0.059) | 2 | Unimodal pattern with afternoon peak                                                                                  |                                                                                       |
| 89 | 149.096 | <b>C<sub>10</sub>H<sub>12</sub>O</b>            | Methyl chavicol (estragole)                   |    | 0.007<br>(0.004) | 0.03<br>(0.027)  | 1 | Bimodal pattern with morning and evening peaks                                                                        |                                                                                       |
| 90 | 153.092 | <b>C<sub>9</sub>H<sub>12</sub>O<sub>2</sub></b> | Oxonopinone                                   |   | 0.009<br>(0.004) | 0.029<br>(0.026) | 1 | Bimodal pattern with afternoon and evening peaks                                                                      |                                                                                       |
| 91 | 153.128 | <b>C<sub>10</sub>H<sub>16</sub>O</b>            | Camphor, pinene oxide                         |  | 0.022<br>(0.015) | 0.096<br>(0.086) | 1 | Bimodal pattern with afternoon and evening peaks                                                                      |                                                                                       |
| 92 | 155.108 | <b>C<sub>9</sub>H<sub>14</sub>O<sub>2</sub></b> | Norpinonaldehyde                              |  | 0.012<br>(0.006) | 0.026<br>(0.022) | 1 | Unimodal pattern with afternoon peak                                                                                  |                                                                                       |
| 93 | 155.144 | <b>C<sub>10</sub>H<sub>18</sub>O</b>            | Cineole, Linalool, 4-tert-butyl cyclohexanone |  | 0.01<br>(0.007)  | 0.023<br>(0.019) | 1 | Unimodal pattern with afternoon peak in monsoon while bimodal pattern with afternoon and evening peak in post-monsoon |                                                                                       |

|     |           |         |                                                  |                                                              |                                                                                     |                  |                  |     |                                                  |
|-----|-----------|---------|--------------------------------------------------|--------------------------------------------------------------|-------------------------------------------------------------------------------------|------------------|------------------|-----|--------------------------------------------------|
| 94  |           | 157.122 | <b>C<sub>9</sub>H<sub>16</sub>O<sub>2</sub></b>  | C9- ester                                                    | 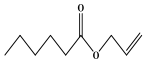   | 0.013<br>(0.007) | 0.026<br>(0.023) | 1   | Unimodal pattern with afternoon peak             |
| 95  |           | 159.14  | <b>C<sub>9</sub>H<sub>18</sub>O<sub>2</sub></b>  | C9-organic acid                                              |    | 0.020<br>(0.012) | 0.038<br>(0.031) | 1   | Unimodal pattern with afternoon peak             |
| 96  |           | 177.056 | <b>C<sub>10</sub>H<sub>8</sub>O<sub>3</sub></b>  | 2-Formylcinnamic acid / hydroxy-methyl-coumarin              |    | 0.008<br>(0.005) | 0.026<br>(0.022) | 1   | Bimodal pattern with afternoon and evening peaks |
| 97  |           | 185.121 | <b>C<sub>10</sub>H<sub>16</sub>O<sub>3</sub></b> | cis-Pinonic acid                                             |    | 0.006<br>(0.004) | 0.01<br>(0.008)  | 0.4 | Unimodal pattern with afternoon peak             |
| 98  |           | 195.138 | <b>C<sub>12</sub>H<sub>18</sub>O<sub>2</sub></b> | Myrtenyl acetate                                             |    | 0.002<br>(0.001) | 0.006<br>(0.006) | 0.4 | Unimodal pattern with afternoon peak             |
| 99  | NVOC<br>S | 42.03   | <b>C<sub>2</sub>H<sub>3</sub>N</b>               | Acetonitrile                                                 |  | 0.291<br>(0.126) | 0.942<br>(0.714) | 4   | Bimodal pattern with morning and evening peaks   |
| 100 |           | 44.018  | <b>HNCO</b>                                      | Isocyanic acid                                               | $\text{HN}=\text{C}=\text{O}$                                                       | 0.051<br>(0.038) | 0.139<br>(0.095) | 4   | Bimodal pattern with morning and afternoon peaks |
| 101 |           | 46.025  | <b>CH<sub>3</sub>NO</b>                          | Formamide                                                    |  | 0.232<br>(0.206) | 0.296<br>(0.236) | 6   | Unimodal pattern with afternoon peak             |
| 102 |           | 48.048  | <b>CH<sub>5</sub>NO</b>                          | methoxyamine                                                 |  | 0.003<br>(0.002) | 0.01<br>(0.009)  | 1   | Bimodal pattern with morning and evening peaks   |
| 103 |           | 76.037  | <b>C<sub>2</sub>H<sub>5</sub>NO<sub>2</sub></b>  | Nitroethane                                                  |  | 0.009<br>(0.005) | 0.213<br>(0.206) | 0.5 | Unimodal pattern with afternoon peak             |
| 104 |           | 84.08   | <b>C<sub>5</sub>H<sub>9</sub>N</b>               | Pentanenitrile/<br>Methylbutanenitrile isomers/<br>C5-amines |  | 0.005<br>(0.003) | 0.021<br>(0.022) | 0.5 | Bimodal pattern with morning and                 |

|     |            |         |                                                 |                                                       |                                                                                     |                  |                  |     |                                                  |
|-----|------------|---------|-------------------------------------------------|-------------------------------------------------------|-------------------------------------------------------------------------------------|------------------|------------------|-----|--------------------------------------------------|
|     |            |         |                                                 |                                                       |                                                                                     |                  |                  |     | evening peaks                                    |
| 105 |            | 116.108 | <b>C<sub>6</sub>H<sub>13</sub>NO</b>            | C6-amide                                              | 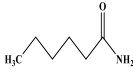   | 0.006<br>(0.004) | 0.01<br>(0.007)  | 0.2 | Unimodal pattern with afternoon peak             |
| 106 |            | 124.039 | <b>C<sub>6</sub>H<sub>5</sub>NO<sub>2</sub></b> | Nitrobenzene                                          |    | 0.006<br>(0.004) | 0.019<br>(0.018) | 1   | Trimodal pattern                                 |
| 107 |            | 138.056 | <b>C<sub>7</sub>H<sub>7</sub>NO<sub>2</sub></b> | Nitrotoluene/<br>salicylamide                         |    | 0.003<br>(0.001) | 0.013<br>(0.01)  | 0.5 | Trimodal pattern                                 |
| 108 |            | 154.052 | <b>C<sub>7</sub>H<sub>7</sub>NO<sub>3</sub></b> | Nitrobenzyl alcohol/Nitro cresols, methyl-nitrophenol |    | 0.005<br>(0.004) | 0.024<br>(0.025) | 0.5 | Trimodal pattern                                 |
| 109 | CIVOC<br>S | 62.997  | <b>C<sub>2</sub>H<sub>3</sub>Cl</b>             | Vinyl chloride                                        |   | 0.004<br>(0.003) | 0.015<br>(0.011) | 1   | Bimodal pattern with afternoon and evening peaks |
| 110 |            | 146.977 | <b>C<sub>6</sub>H<sub>4</sub>Cl<sub>2</sub></b> | Dichlorobenzene                                       |  | 0.025<br>(0.021) | 0.115<br>(0.121) | 0.1 | Bimodal pattern with morning and evening peaks   |
| 111 | SVOC<br>S  | 49.007  | <b>CH<sub>4</sub>S</b>                          | Methanethiol                                          |  | 0.048<br>(0.047) | 0.128<br>(0.129) | 1   | Bimodal pattern with morning and evening peaks   |

- Bold ones in Molecular formula column are those compounds whose isotopic peaks were observed

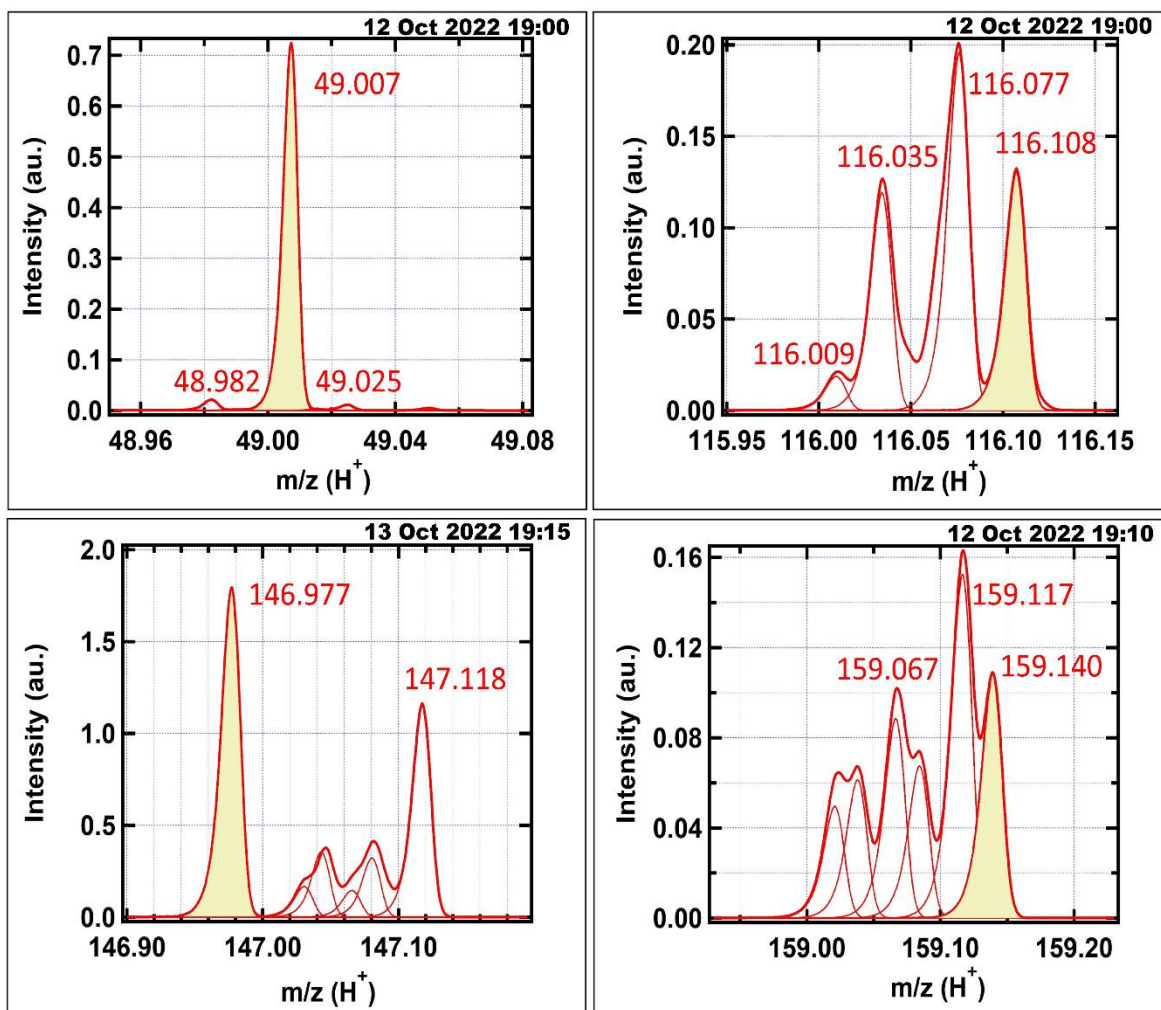

**Figure S1** Example of mass spectra and peak assignment using IDA software which also illustrate the high mass resolving power of the PTR-ToF-MS 10K enabling separation of ion signals that land at the same nominal masses.

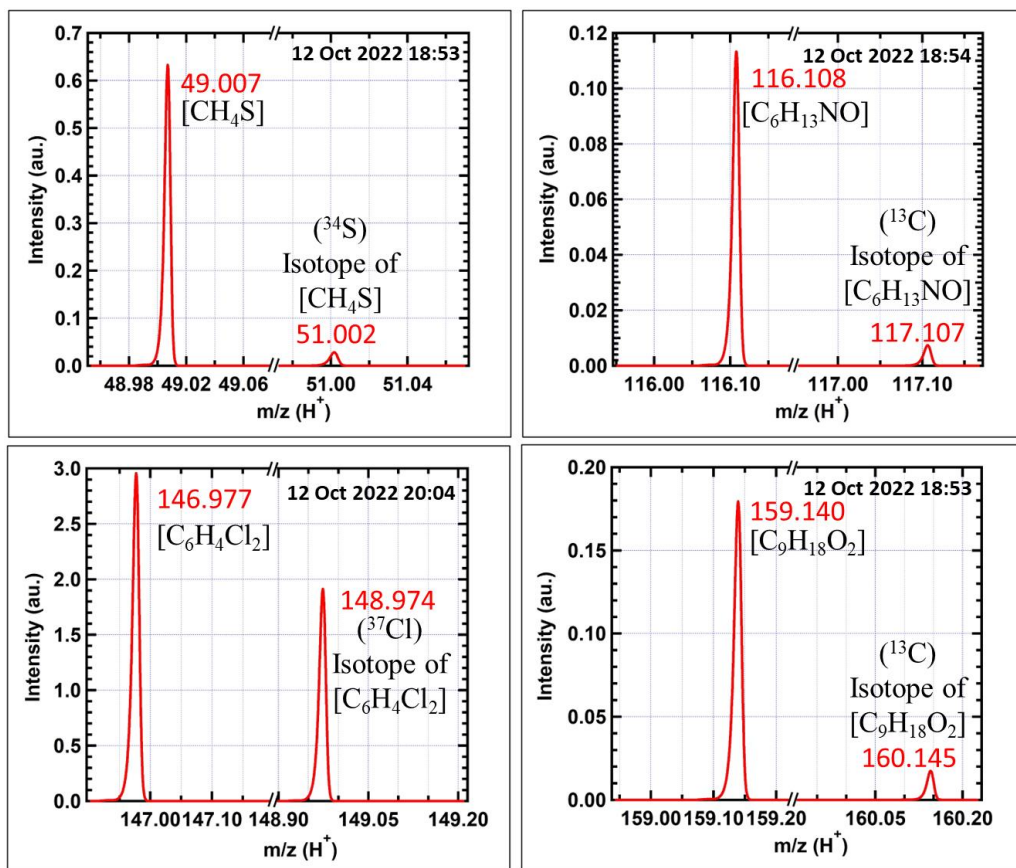

**Figure S2** Mass spectra of methanethiol, dichlorobenzene, C6-amide and C9- carboxylic acid which also illustrate the high mass resolving power of the PTR-ToF-MS 10K enabling identification of isotopic peaks

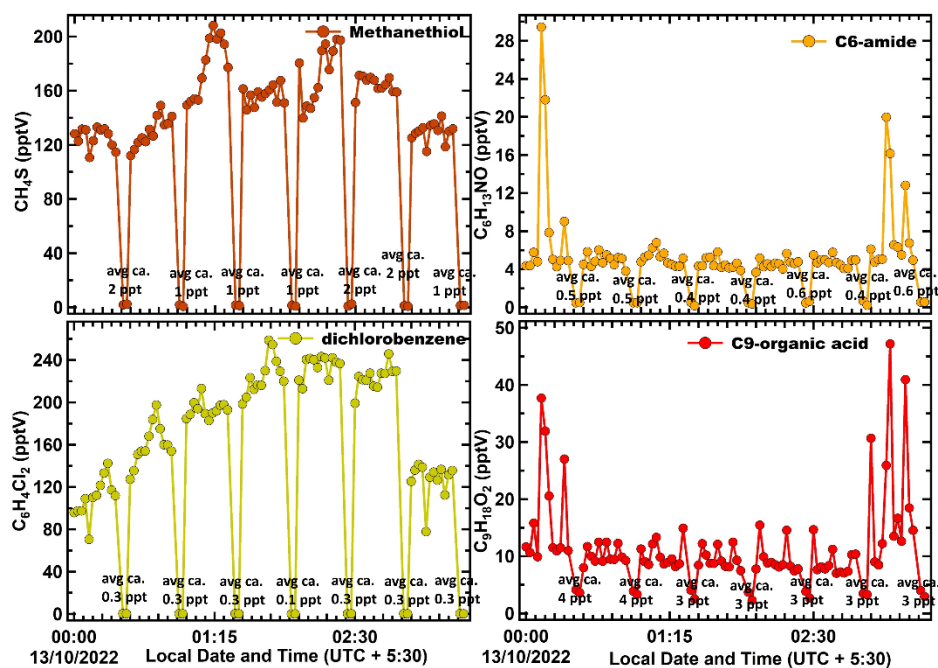

**Figure S3:** Example of measured data showing the ambient data and instrument background mixing ratios (2 min avg) for methanethiol, dichlorobenzene, C-6 amide and C-9 carboxylic acid.



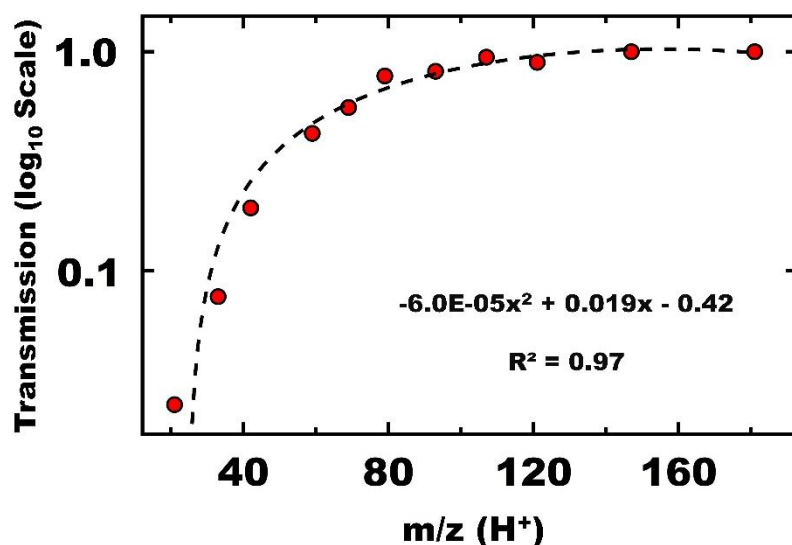

**Figure S4:** Transmission values as a function of m/z for the PTR-TOF-MS 10K obtained during a calibration experiment performed on 26<sup>th</sup> September 2022 using the VOC calibration gas mixture (Societa Italiana Acetilene E Derviati; S.I.A.D. S.p.A., Italy) containing 11 hydrocarbons at ~100 ppb, namely methanol, acetonitrile, acetone, isoprene, benzene, toluene, xylene, trimethylbenzene, and dichlorobenzene and trichlorobenzene

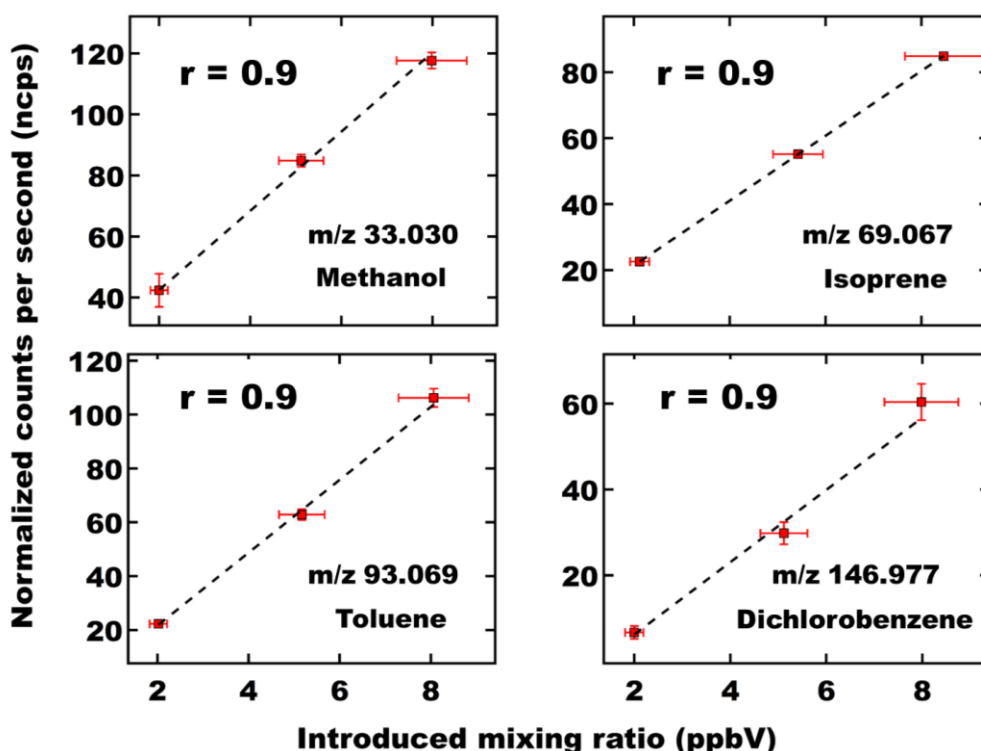

**Figure S5** Sensitivity (ncps/ppb) and linearity of selected VOCs in the calibration experiment (PTR-MS) performed on 26/09/2022. The horizontal error bars represent the root mean square propagation of errors due to 10% uncertainty in the VOC standard and 2% error for each of the two mass flow controllers used for calibration. The vertical error bars represent the standard deviation ( $\sigma$ ) instrumental precision error while sampling the standard gas at each dilution mixing ratio.

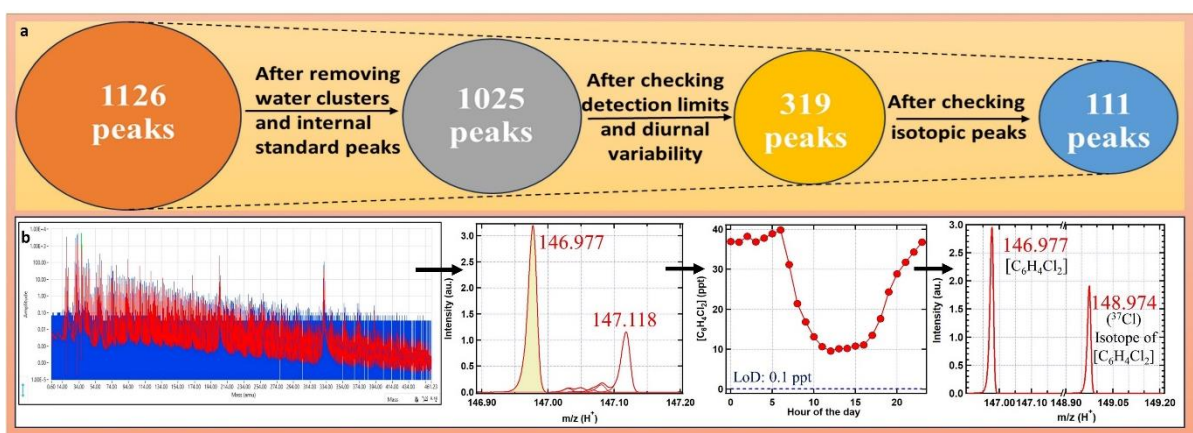

**Figure S6** Visual representation of the process providing also an example compound attribution to an ion (for  $m/z$  146.977; dichlorobenzene) showing isotopic peak match with theoretically predicted isotopic abundance

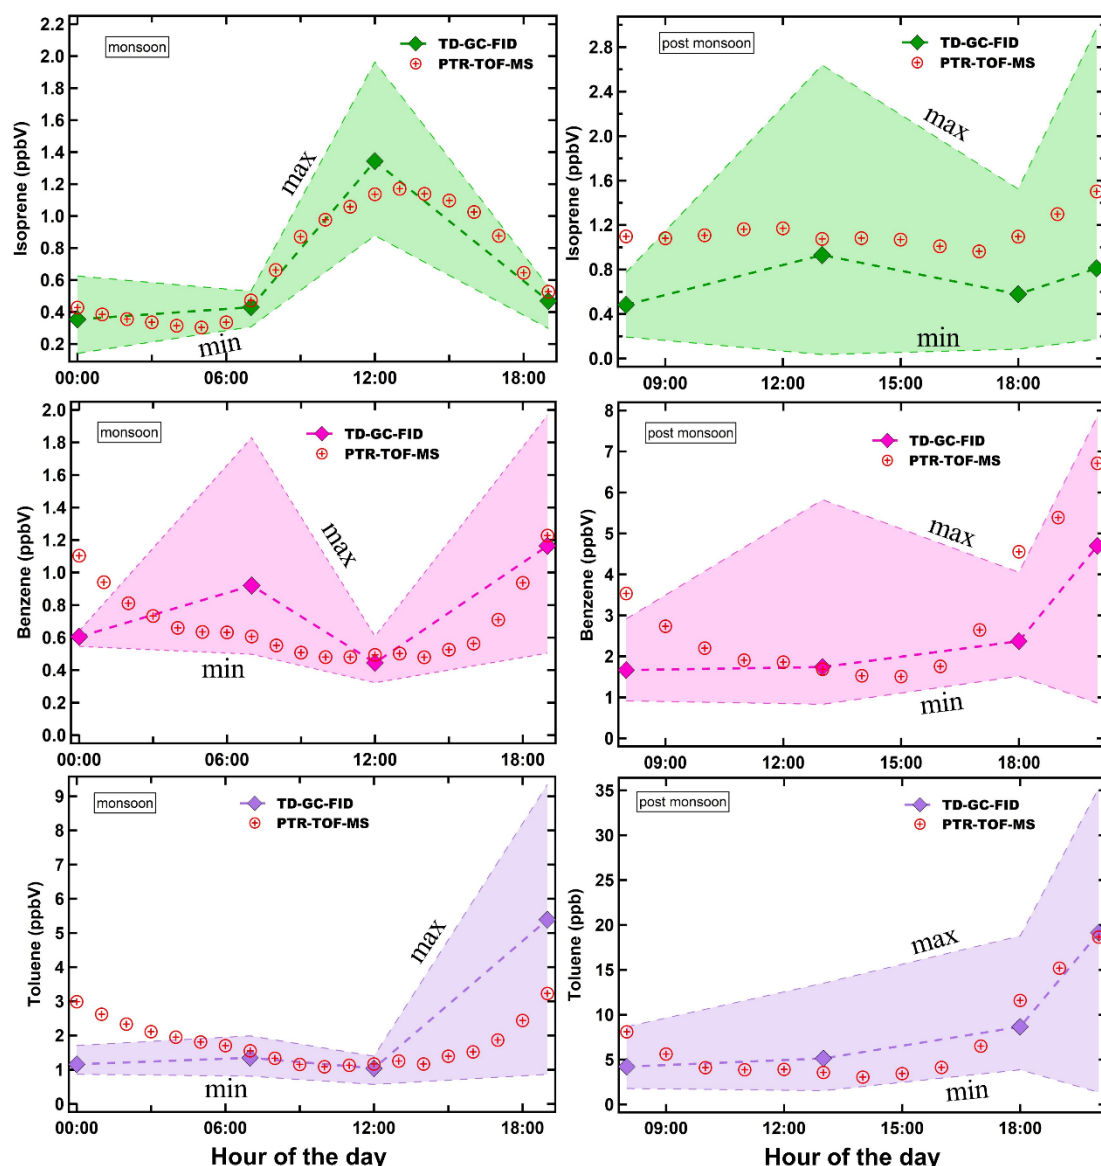

**Figure S7:** Season-wise hourly averaged average mixing ratios of isoprene, benzene and toluene measured using the TD-GC-FID are shown as diamonds and minimum and maximum values for that hourly sampling interval as shaded regions (in green for isoprene, pink for benzene and purple for toluene). The PTR-TOF-MS season-average mixing ratios values presented in Figure 4 are also shown for reference (red circles). During the campaign whole air samples were collected into 6 L passivated SilcoCan air sampling steel canisters (Restek) (Kumar et al., 2020; Vettikkat et al., 2020, Shabin et al., 2024) from the rooftop of the same building to measure isoprene, toluene and benzene using a thermal desorption gas chromatograph coupled to a flame ionisation detector (TD-GC-FID). Technical details pertaining to the TD-GC-FID measurements are available in Shabin et al., 2024. Air samples were collected near the PTR-TOF-MS inlet on the rooftop during post monsoon season, four times a day [during hourly intervals corresponding to 08:00, 13:00, 18:00, 20:00 local time (n=39,) and during monsoon season also four times a day during hourly intervals corresponding to: 00:00, 07:00, 12:00, 19:00 local time (n=15).

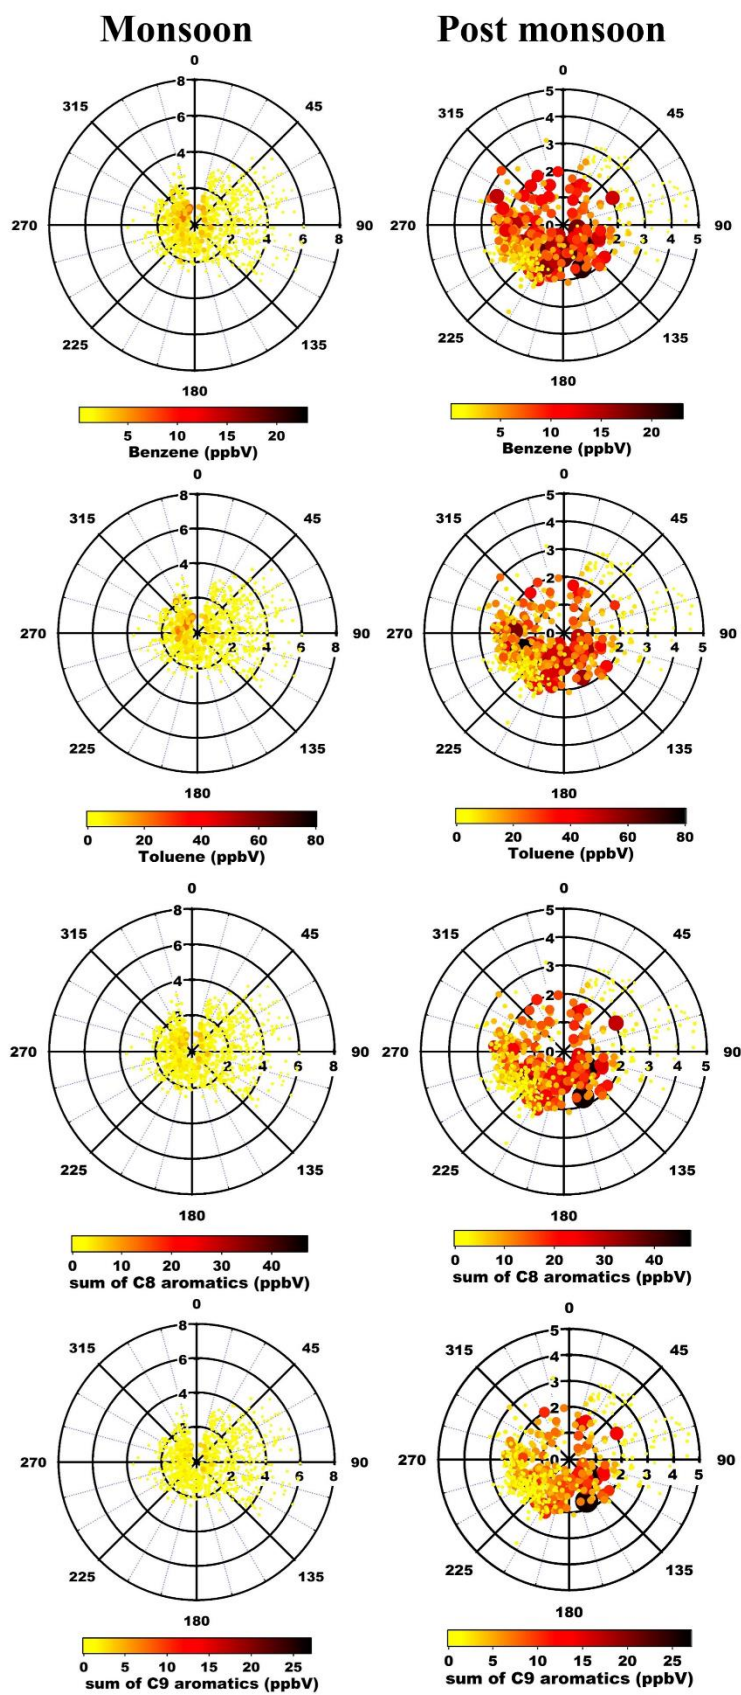

**Figure S8** Wind rose of night-time benzene, toluene, C8 and C9 aromatic compounds at the receptor site during monsoon (left column) and post monsoon (right column) season

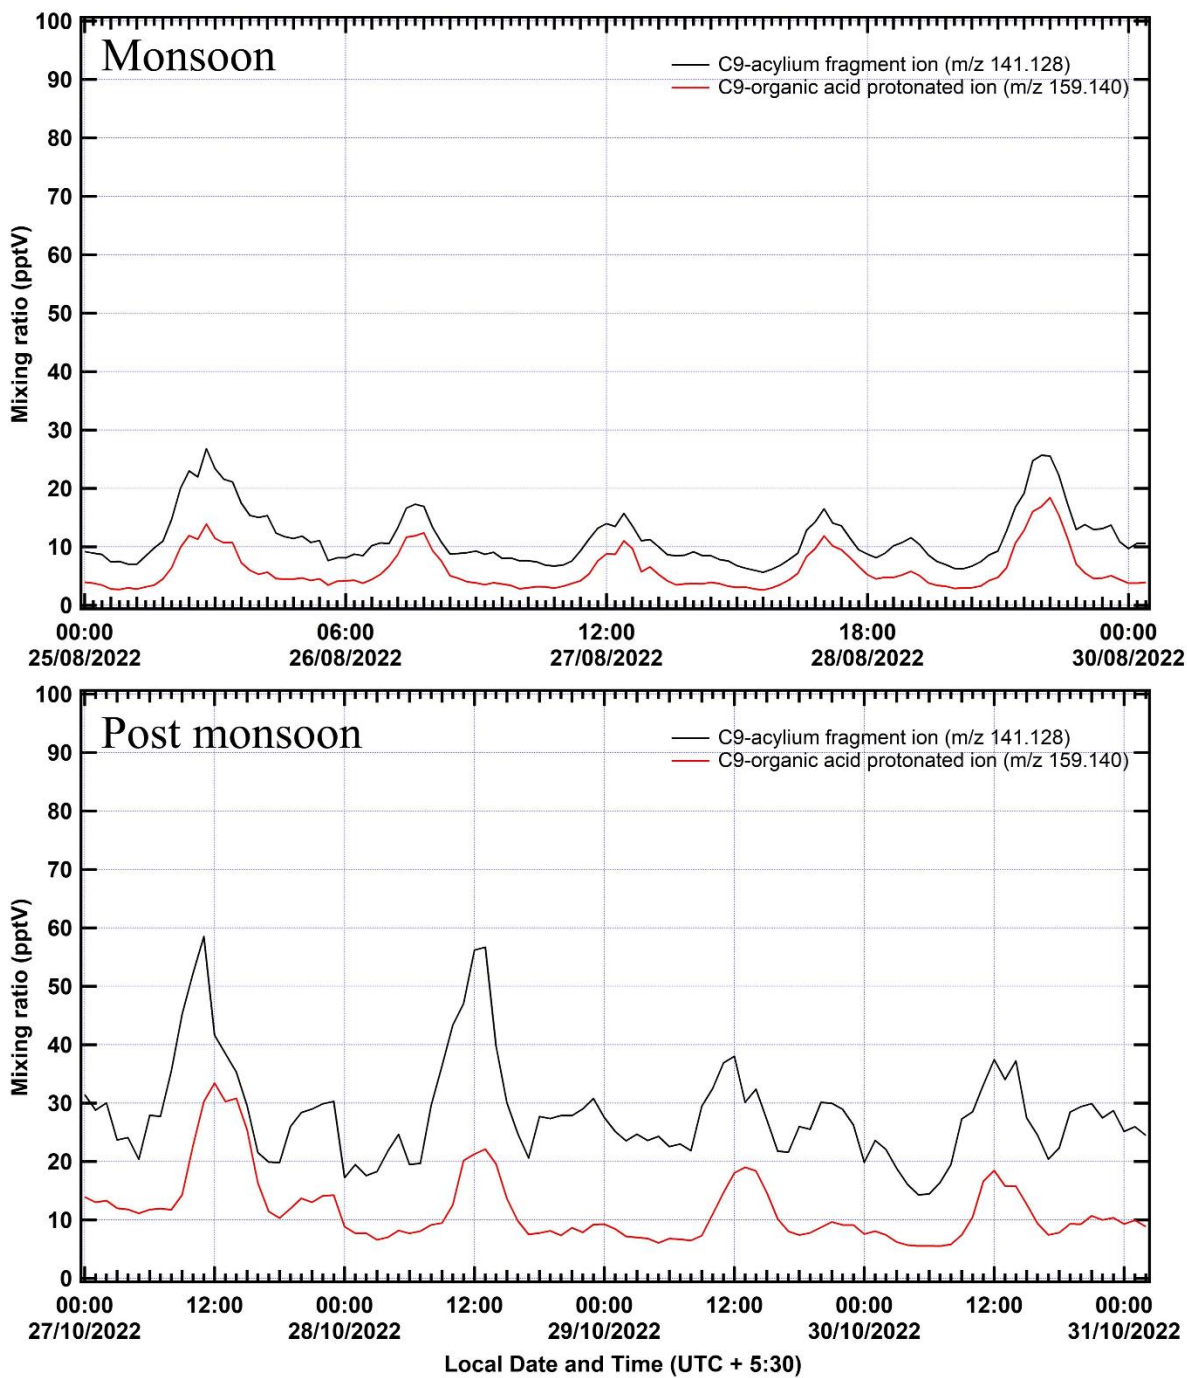

**Figure S9:** Time series of C9-acylium fragmentation ion and C9-organic acid protonated ion during monsoon (25th Aug 2022 to 30th Aug 2022) and post monsoon season (27th Oct 2022 to 31st Oct 2022) provided for illustration

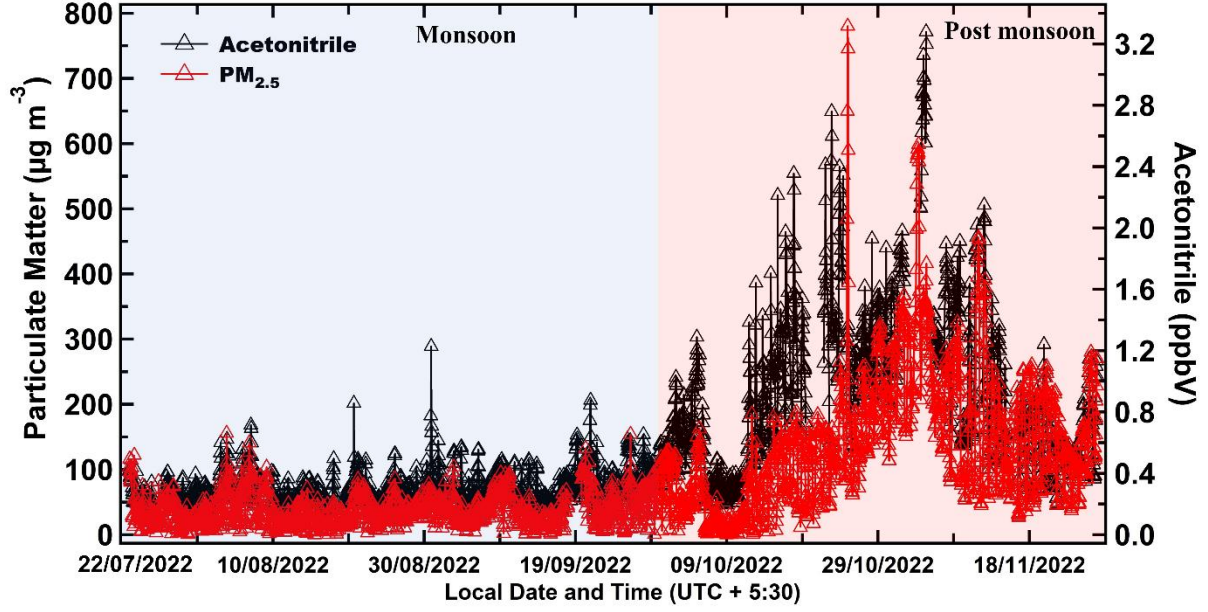

Figure S10: Time series of hourly PM<sub>2.5</sub> and acetonitrile measured at IMD Delhi site

$$[R]_{ppb} = 10^9 \times \frac{\mu_0 U_{drift}}{L^2 k_{VOC+H_3O^+}} \times \frac{P_0^2}{P_{drift}^2} \times \frac{T_{drift}^2}{T_0^2} \times \frac{22400}{N_A} \times \frac{I_{(RH^+)}}{I_{(H_3O^+)}} \times \frac{T_{H_3O^+}}{T_{VOCH^+}} \quad \text{Equation S1}$$

Where  $k_{VOC+H_3O^+}$  = Rate constant of proton transfer from hydronium ion to a VOC

L = Length of drift tube (9.2 cm)

$\mu_o$  = Reduced mobility of  $H_3O^+$  ions ( $2.8 \text{ cm}^2 \text{ V}^{-1} \text{ s}^{-1}$ )

N = Number density of gases in the drift tube

E = Electric field across the drift tube

$U_{drift}$  = Voltage across the drift tube

$P_{drift}$  &  $T_{drift}$  = Drift tube pressure and temperature

$P_0$  &  $T_0$  = Standard pressure and temperature;  $N_A$  = Avogadro Number

$\frac{T_{VOCH^+}}{T_{H_3O^+}}$  = Ratio of transmission efficiency of protonated VOC ions and hydronium ions

Reference:

Shabin, M., Khatarkar, P., Hakkim, H, et al., Monsoon and post-monsoon measurements of 53 non-methane hydrocarbons (NMHCs) in megacity Delhi and Mohali reveal similar NMHC composition across seasons, *Urban Climate*, Volume 55, 101983, 2024.
